# Supplementary material
Source: MDPI journal article supplement (https://www.mdpi.com/2227-9717/11/8/2240)

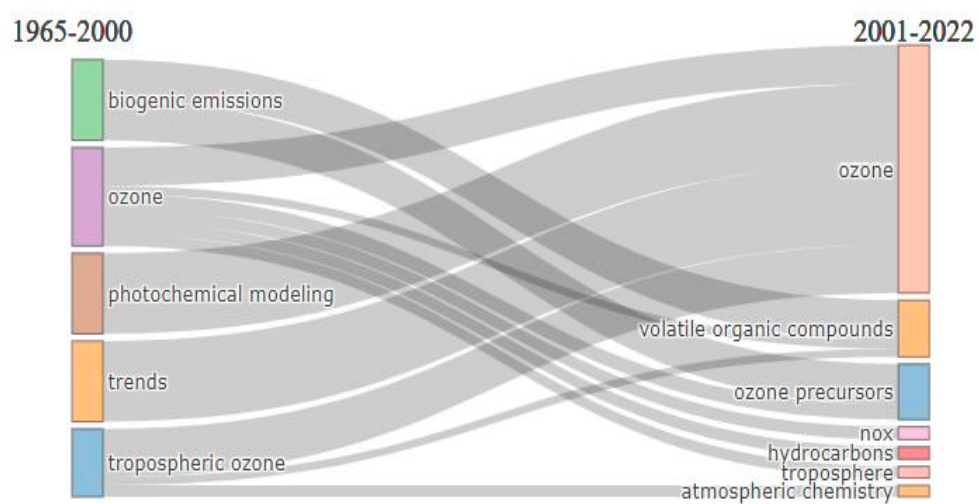

**Figure S4.** Thematic evolution of Author keywords in Ozone formation sensitivity research.

Supplement: s1 [file s1 › processes-2459874-supplementary.pdf]
